## Nutrient stoichiometry shapes microbial coevolution

2

Megan L. Larsen<sup>1</sup>, Steven W. Wilhelm<sup>2</sup>, Jay T. Lennon<sup>\*1</sup>

4

<sup>1</sup>Department of Biology, Indiana University, Bloomington, IN 47405

6

<sup>2</sup>Department of Microbiology, University of Tennessee, Knoxville, TN 37996

\*Correspondence to: [lennonj@indiana.edu](mailto:lennonj@indiana.edu).

8

Running title: Nutrient stoichiometry and coevolution

10

Keywords: bacteria, phage, resources, resistance, arms race, networks

Article type: Letter

12

Abstract word count:

(original manuscript: 150; revised manuscript: 150)

14

Main text word count: (original manuscript: 4817; revised manuscript: 5369)

Reference count: (original manuscript: 50; revised manuscript: 52)

16

Figure count: 5

18

Table count: 0

20

**Author contributions:** MLL, SWW, and JTL designed study; MLL performed research; MLL and JTL analyzed data; MLL, SWW, and JTL wrote paper.

22

**Available code and data.** Data and code are available in the public GitHub repository

24

<https://github.com/LennonLab/eco-evo-stoich>

26

## ABSTRACT

28 Coevolution is a force contributing to the generation and maintenance of biodiversity. It  
30 is influenced by environmental conditions including the scarcity of essential resources, which  
32 can drive the evolution of defense and virulence traits. We conducted a long-term chemostat  
34 experiment where the marine cyanobacterium *Synechococcus* was challenged with a lytic  
36 phage under nitrogen (N) or phosphorus (P) limitation. This manipulation of nutrient  
38 stoichiometry altered the stability of host-parasite interactions and the underlying mode of  
40 coevolution. By assessing infectivity with >18,000 pairwise challenges, we documented  
directional selection for increased phage resistance, consistent with arms-race dynamics  
while phage infectivity fluctuated through time, as expected when coevolution is driven by  
negative frequency-dependent selection. The resulting infection networks were 50 % less  
modular under N- versus P-limitation reflecting host-range contraction and asymmetric  
coevolutionary trajectories. Nutrient stoichiometry affects eco-evolutionary feedbacks in  
ways that may alter the dynamics and functioning of environmental and host-associated  
microbial communities.

42

44

46

## INTRODUCTION

48

In order to grow and reproduce, organisms must assimilate resources from the environment to meet their nutritional and energetic demands. Ecological stoichiometry is a

50

theoretical framework that explicitly considers the mass balance of materials and energy in the environment and the individuals that incorporate them (Sturner & Elser 2002). Of the

52

approximately 25 elements contained in biomass, nitrogen (N) and phosphorus (P) are two of the most limiting and essential nutrients. N and P are needed for the synthesis of major

54

macromolecules, including nucleic acids, ribosomes, proteins, and cellular membranes that collectively influence an organism's performance. However, the degree to which N and P are

56

regulated differs among major groups of taxa. For example, the biomass stoichiometry of primary producers tends to be flexible, reflecting the supply of nutrients in their environment

58

(Sturner & Elser 2002). In contrast, the biomass stoichiometry of consumer populations (e.g., viruses, invertebrates, mammals) is homeostatically regulated and therefore tends to remain

60

constant even when the nutrient content of their resources fluctuates (Sturner & Elser 2002).

Such differences can create a nutritional imbalance between primary producers and consumers,

62

which has profound consequences for a wide range of ecological processes including resource competition, host-parasite dynamics, and ecosystem functioning (Smith & Holt 1996; Hall 2009;

64

Aalto *et al.* 2015).

Nutrient stoichiometry can also influence evolutionary processes. Nutrient limitation

66

often leads to a reduction in population size, which can diminish the efficiency of selection and result in the accumulation of deleterious mutations through genetic drift (Kimura 1962).

68

However, many populations have adaptations that allow individuals to contend with absolute and relative resource scarcity. For example, the disproportionate use of nucleotides that vary in N

70 content reduces stoichiometric mismatch between an organism and its environment (Elser *et al.*  
2011). Similarly, natural selection can operate on the material costs of gene expression in ways  
72 that lead to the sparing of elements that are normally used in highly expressed proteins (Bragg &  
Wagner 2009). These genetic responses to nutrient limitation may give rise to the evolution of  
74 organismal stoichiometry. For example, long-term carbon limitation led to increased N and P  
content of experimentally evolved bacterial populations (Turner *et al.* 2017). However,  
76 evolutionary responses to nutrient stoichiometry may depend on the identity of the limiting  
nutrient (Gresham *et al.* 2008). While N limitation can select for stress-related or catabolic genes  
78 with lower guanine-cytosine content (Acquisti *et al.* 2009), P limitation can favor the  
replacement of phospholipids with sulfolipids in the cell membranes of certain microorganisms  
80 (Van Mooy *et al.* 2006).

When considering multiple interacting species, the combined effects of nutrient  
82 stoichiometry may give rise to eco-evolutionary feedbacks. Such feedbacks occur when  
ecological interactions affect evolutionary processes, which in turn modify species interactions  
84 and ecological dynamics (Haloin & Strauss 2008). For example, the rapid evolution of functional  
traits can produce diminished oscillations, longer periods of cycling, and phase-shifted  
86 population densities between hosts and their parasites, a phenomenon referred to as "cryptic  
dynamics" (Yoshida *et al.* 2007). Theory suggests that cryptic dynamics can arise when nutrient  
88 stoichiometry alters the stability of antagonistic species interactions (Yamamichi *et al.* 2015),  
which may ultimately intensify the modes of coevolution, namely arms-race dynamics and  
90 negative frequency-dependent selection (Aalto *et al.* 2015). However, links among nutrient  
stoichiometry, eco-evolutionary feedbacks, and coevolution remain to be tested.

92 Major advances in evolutionary ecology have been made through experimental studies of  
microbial communities. In particular, bacteria and phage are ideal for studying eco-evolutionary  
94 feedbacks owing to their large population sizes, rapid growth rates, and experimental tractability.  
Moreover, bacteria and phage dynamics are critical for understanding the structure and function  
96 of microbial food webs, especially in aquatic ecosystems (Suttle 2007). For example,  
*Synechococcus* is a diverse and widely distributed group of primary producers in the world ocean  
98 with an estimated global abundance of  $10^{26}$  cells (Flombaum *et al.* 2013). While *Synechococcus*  
must contend with both N- and P-limitation, it is also subject to a high degree of phage-induced  
100 mortality, which may lead to nutrient-dependent coevolutionary dynamics. These coevolutionary  
processes can create feedbacks that not only influence population dynamics, but also ecosystem  
102 functioning, including the turnover of N and P (Lennon & Martiny 2008).

In this study, we tested how nutrient stoichiometry affects host-parasite eco-evolutionary  
104 dynamics in a simplified community where a single genotype of marine *Synechococcus* was  
infected with a phage strain in continuous culture using chemostats that were supplied with either  
106 N- or P-limited media. We isolated hundreds of host and phage strains, which were challenged  
against one another to document phenotypic changes in resistance and infectivity over the course  
108 of the experiment. With this information, we conducted network analyses that allowed us to  
quantify the degree of nestedness and modularity, which can serve as signatures of shed light on  
110 the underlying modes of coevolution, namely arms race dynamics and negative frequency  
dependent selection (Weitz *et al.* 2013). Our findings reveal that nutrient stoichiometry is a  
112 bottom-up force that regulates eco-evolutionary feedbacks in ways that alter coevolutionary  
processes.

114

## METHODS

116 **Strains and media** — We evaluated the effects of nutrient stoichiometry on the eco-  
evolutionary dynamics of the marine cyanobacterium *Synechococcus* WH7803 and a lytic T4-  
118 like phage belonging to the Myoviridae family of phage (S-RIM8). Changes to nutrient supply  
can alter the equilibrium density of microbial populations in continuous culture (i.e.,  
120 chemostats), which in turn, may affect cyanobacteria-phage contact rates (Rhee 1978).  
Therefore, we adjusted both the concentrations and ratios of N and P in modified AN artificial  
122 seawater medium (Tables S1-S3) to induce N- or P-limitation while maintaining similar  
equilibrium densities of *Synechococcus* between the stoichiometry treatments prior to phage  
124 addition. Specifically, the N-limited medium had an N : P ratio of 10 : 1 (KNO<sub>3</sub>; N = 220 μM)  
while the P-limited medium had a N : P ratio of 40 : 1 (K<sub>2</sub>HPO<sub>4</sub>; P = 11 μM). Growth assays  
126 confirmed that *Synechococcus* was limited by N under low N : P supply and by P under high N :  
P supply (Fig. S1).

128  
**Nutrient limitation assay** — We tested for nutrient limitation in *Synechococcus* by measuring  
130 growth rates on cells that had been maintained under low (10 : 1) and high (40 : 1) supply ratio  
of N and P. We acclimated *Synechococcus* semi-continuously under constant light (20 μE m<sup>-1</sup> s<sup>-1</sup>)  
132 at 25 °C for three serial transfers in either N- or P-limited medium (n = 10). We then inoculated  
each replicate cell line into fresh medium that doubled the concentration of N (N-limited = 440  
134 μM, P-limited = 880 μM) or P (N-limited = 44 μM, P-limited = 22 μM). Next, we monitored  
*Synechococcus* population densities for seven days *via* autofluorescence (ex: 550 nm, em: 570  
136 nm) with a Biotek Synergy Mx plate reader (Winooski, VT, USA). With these data, we  
estimated the maximum growth rate for each culture using a modified Gompertz equation

138 (Lennon et al. 2007) and calculated the percent change in growth rate with additional N or P as  
compared to the control, which contained no additional N or P.

140

**Chemostat experiment** — We supplied ten chemostats, each with a 40 mL operating volume,  
142 with N-limited or P-limited medium at a dilution rate of  $1 \text{ d}^{-1}$  (Tables S1-S3). The chemostats  
were maintained in a Percival growth chamber (Perry, IA, USA) at  $25 \text{ }^{\circ}\text{C}$  on a 14:10 light : dark  
144 cycle under  $20 \mu\text{E m}^{-2} \text{ s}^{-1}$  and homogenized with magnetic stir bars following inoculation with a  
single-colony strain of *Synechococcus* WH7803. We allowed the *Synechococcus* populations to  
146 equilibrate in the chemostats prior to initiating the "phage-amended" treatment by introducing an  
aliquot of a plaque-purified S-RIM8 to three randomly chosen chemostats in each nutrient  
148 treatment to achieve a multiplicity of infection (phage : cyanobacteria ratio) of approximately 10.  
To document the potential influence of stoichiometry on population dynamics and population  
150 size, we maintained "no phage" chemostats with only *Synechococcus* in both stoichiometry  
treatments (Fig. S2).

152

**Community dynamics** — We tracked *Synechococcus* and phage densities in each chemostat via  
154 epifluorescent microscopy every other day for 172 days. *Synechococcus* populations were  
enumerated by concentrating samples from a chemostat onto  $0.22\text{-}\mu\text{m}$  nominal pore-size black  
156 polycarbonate filters. After removing cellular material ( $0.2 \mu\text{m}$  filtration) and extracellular DNA  
with DNase I, we concentrated samples onto  $0.02 \mu\text{m}$  Anodisc filters to estimate the abundance  
158 of free phage particles. Each phage-containing filter was then stained with SYBR Green I  
(Noble & Fuhrman 1998). We estimated population densities after capturing ten images from  
160 each filter with a CY3 filter set (ex:  $550 \text{ nm}$ , em:  $570 \text{ nm}$ ) for *Synechococcus* or a FITC filter set

(ex: 497 nm, em: 520 nm) for phage using a Zeiss microscope and image processing modules  
162 found in the base package of the Axiovision imaging software (Release 4.5 SP1).

We evaluated the influence of nutrient stoichiometry on community dynamics in three  
164 ways. First, we used repeated measures (RM) ANOVA to test for the effects of nutrient  
stoichiometry and time on *Synechococcus* and phage densities. Second, because cryptic  
166 dynamics can alter the temporal synchrony between hosts and parasites, we performed cross-  
correlation analyses for each chemostat using Auto Regressive Moving Average (ARMA)  
168 procedures (Lennon & Martiny 2008). In addition to determining whether populations in a  
chemostat positively or negatively covaried (i.e., in phase vs. out of phase, respectively) we used  
170 the cross-correlation analyses to test if the duration of time which viruses lagged behind host  
densities was altered by nutrient stoichiometry. Last, we estimated the effects of nutrient  
172 stoichiometry on the stability of microbial populations by calculating the inverse of the  
coefficient of variation (CV) over time.

174

**Coevolutionary dynamics** — To test for the effects of nutrient stoichiometry on phenotypic  
176 coevolution, we tracked changes in infection patterns between *Synechococcus* and its phage over  
time. We isolated multiple (3-5) *Synechococcus* strains from each chemostat using serial dilution  
178 techniques six days prior to phage addition (day -6) and at days 9, 23, 72, 129, 148, and 166 after  
phage addition. We performed 10-fold dilutions of chemostat samples into 24-well plates  
180 containing sterile AN media that matched the nutrient supply ratio of the chemostat environment.  
When a dilute suspension of *Synechococcus* 7803 was incubated without shaking, single-  
182 colonies formed in the bottom of the wells (25 °C on a 14:10 light : dark cycle under 20  $\mu\text{E m}^{-2} \text{s}^{-1}$ ). We picked these colonies with a Pasteur pipette and passaged them twice in 50 mL



184 Erlenmeyer flasks using the same medium prior to harvesting. We then used epifluorescence  
microscopy to screen the cultures to make sure they did not contain free phage particles. Finally,  
186 these *Synechococcus* strains were concentrated *via* centrifugation, preserved in glycerol (10 %  
final concentration), and stored at -80 °C until reanimation for use in challenge assays, which are  
188 described below. We also isolated multiple (3-5) phage strains from the phage-amended  
chemostats on days 23, 72, 129, 148, and 166 through double plaque purification. This process  
190 involved adding 40 µL of 0.2 µm-filtered chemostat sample to a soft agar (0.8 % agar) overlay  
containing the ancestral *Synechococcus* WH7803 as the host. We then incubated the serially  
192 diluted plates (25 °C on a 14:10 light : dark cycle under 20 µE m<sup>-2</sup> s<sup>-1</sup>), picked plaques that  
formed on the lawns of *Synechococcus*, and transferred to a log-phase batch culture of  
194 *Synechococcus* for propagation. The resulting phage lysates were syringe-filtered (1 µm) and  
preserved in glycerol (10 % final concentration) at -80 °C.

196 With the isolated chemostat strains, we quantified host resistance and phage infectivity  
using challenge assays. Each pair-wise challenge with strains isolated across chemostats within  
198 the same nutrient treatment was carried out in triplicate by adding 20 µL of a phage stock (~10<sup>7</sup>  
particles mL<sup>-1</sup>) to 200 µL of a dilute *Synechococcus* strain (~10<sup>6</sup> cells mL<sup>-1</sup>) in 96-well plates.  
200 Challenge assays were performed using the same medium from which the host strain was  
originally isolated (i.e., low vs. high N : P). Turbid cultures of *Synechococcus* WH7803 appear  
202 bright pink owing to the intracellular photosynthetic pigment phycoerythrin. When infected by  
SRIM8, however, cells are lysed and cultures become clear (Lennon & Martiny 2008). Based on  
204 this, we scored each *Synechococcus* strain as sensitive (and the phage strain as infective) if there  
was a lack of growth after a two-week incubation under continuous light (20 µE m<sup>-2</sup> s<sup>-1</sup>) at 25 °C  
206 compared to control wells (n = 3) that contained heat-killed phage. To contend with the loss of a

replicate chemostat in the N-limited treatment, we randomly selected *Synechococcus* strains  
208 across the two P-limited replicate chemostats to ensure that an identical number of strains were  
tested at each time point. In total, there were 18,050 pairwise challenges between chemostat-  
210 isolated strains of *Synechococcus* and phage that resulted in a bipartite infection matrix, which  
we used for all analyses related to phenotypic coevolution.

212 To quantify the effect of nutrient stoichiometry on coevolutionary dynamics, first, we  
used RM-ANOVA to test for trends in average resistance and average infectivity over the course  
214 of the chemostat experiment. Second, we used the infection matrix to perform time-shift  
analyses, which involved calculating the proportion of successful infections that occurred  
216 between hosts that were challenged against past, contemporary, and future phage strains (Gaba &  
Ebert 2009). We statistically analyzed the time-shift data using RM-ANOVA with nutrient  
218 treatment, phage treatment, and time as fixed effects, while the chemostat replicate identifier was  
treated as a random effect with a corARMA covariance matrix (Koskella 2014). To visualize the  
220 data, contemporary challenges were centered at a time-shift of zero, while interactions with past  
phage were represented in negative space and future interactions were represented in positive  
222 space. Last, to gain insight into potential mechanisms underlying stoichiometrically driven  
coevolution, we used community network analyses to calculate the connectance, nestedness, and  
224 modularity for each chemostat infection matrix. Connectance was calculated as the number of  
interactions divided by network size. We calculated nestedness using the NODF metric, which  
226 ranges from 0 (non-nested) to 1 (perfectly nested) and normalizes for matrix size. We used the  
LP-BRIM algorithm to find the partition that maximizes Barber's modularity ( $Q_b$ ), which ranges  
228 from 0 (all interactions are between modules) to 1 (all interactions are within modules). The  
network statistics were calculated using 100,000 random Bernoulli simulations in the BiWeb

230 package for MATLAB (Flores *et al.* 2011; Flores *et al.* 2016), <http://github.com/tpoisot/BiWeb>).  
We then tested for differences in connectance, nestedness, and modularity between the nutrient  
232 treatments using *t*-tests.

## 234 RESULTS

**Nutrient limitation of *Synechococcus*** — Prior to initiating the chemostat evolution trial, we  
236 conducted growth assays to test for N- and P-limitation of *Synechococcus*. After a period of  
acclimation in semi-continuous culture, the growth rates of N-limited *Synechococcus* increased  
238 by 87 % when additional N was supplied, but only by 35 % with the addition of P (*t*-test,  $t_8 =$   
4.55,  $P < 0.001$ ). In contrast, the growth rate of P-limited *Synechococcus* increased by 45 % with  
240 the addition of P, but only by 25 % with the addition of N (*t*-test,  $t_8 = -3.36$ ,  $P = 0.005$ ). Results  
from this experiment suggest that while there may have been some degree of co-limitation, the  
242 two media sources used for subsequent evolution trials induced N- and P- limitation for  
*Synechococcus* (Fig. S1).

244  
**Stoichiometry altered community dynamics** — In the chemostat experiment, nutrient  
246 stoichiometry significantly affected the population dynamics of *Synechococcus* (RM-ANOVA;  
time x stoichiometry,  $F_{62, 245} = 2.43$ ,  $P < 0.0001$ ) and its phage (RM-ANOVA; time x  
248 stoichiometry,  $F_{58, 230} = 2.59$ ,  $P < 0.0001$ ). Under N-limitation, *Synechococcus* rapidly declined  
and reached its minimum mean density 35 days (range = 23 – 44) following phage addition ( $2 \times$   
250  $10^5 \pm 7 \times 10^4$  cells mL<sup>-1</sup>, mean  $\pm$  SEM, Fig. 1a). This decrease in host abundance corresponded  
with a peak in mean maximum density 25 days (range = 16 – 30) following phage addition ( $9 \times$

252  $10^8 \pm 1 \times 10^8$  particles  $\text{mL}^{-1}$ , mean  $\pm$  SEM). Over the next  $\sim 50$  days, the host densities slowly recovered, and entered a second phase of decline near day 100.

254 *Synechococcus* and phage densities were significantly different and less dynamic under P-limitation (Fig. 1b). Hosts declined more slowly in P-limited chemostats following phage addition than in N-limited chemostats ( $t$ -test,  $t_4 = -4.00$ ,  $P = 0.02$ ) and reached their mean minimum density 78 (range = 63 – 93) days following phage addition ( $4 \times 10^5 \pm 6 \times 10^4$  cells  $\text{mL}^{-1}$ , mean  $\pm$  SEM). Though hosts recovered, they did not reach pre-phage-addition abundances until the end of the experiment. Phage densities under P-limitation remained high and relatively constant ( $2 \times 10^8 \pm 9 \times 10^7$  particles  $\text{mL}^{-1}$ , mean  $\pm$  SEM) throughout the duration of the experiment. In the no-phage control chemostats, N- and P- limited *Synechococcus* densities remained constant over time (Fig. S2).

Nutrient stoichiometry also affected the temporal coherence and stability of *Synechococcus* and phage populations. After pre-whitening the time-series data using ARMA procedures, phage densities in N-limited chemostats were negatively correlated with host densities with lags ranging from zero to five days ( $r = -0.27$  to  $-0.42$ ,  $P = 0.009 - 0.063$ , Fig. S3). In contrast, under P-limitation, there was no correlation between phage and *Synechococcus* at any time lag ( $r = -0.20$  to  $0.22$ ,  $P \geq 0.23$ ). Last, we found that cyanobacterial and phage densities were significantly more stable over time under P- than N-limited conditions (*Synechococcus*:  $t$ -test,  $t_4 = 3.56$ ,  $P = 0.024$ ;  $t$ -test, phage:  $t_4 = 3.83$ ,  $P = 0.019$ ). See Table S4 for summary statistics.

272 **Stoichiometry altered coevolution** — Within nine days of phage addition,  $>50\%$  of the isolated *Synechococcus* strains were resistant to the ancestral phage in both the N- and P-limited chemostats (Fig. 2). Average resistance continued to increase over time (RM-ANOVA,  $F_{6, 591} =$

14.2,  $P < 0.0001$ ), but was not affected by stoichiometry ( $F_{1,4} = 2.08$ ,  $P = 0.22$ ). The vast  
276 majority (97 %) of *Synechococcus* strains that were resistant to the ancestral phage were also  
resistant to all of the phage strains subsequently isolated from the chemostats. Phage-resistant  
278 *Synechococcus* did not revert to the sensitive phenotype when grown in the absence of phage  
consistent with the view that resistance is a heritable trait.

280 Phage infectivity also evolved, but in contrast to the host, was significantly affected by  
nutrient stoichiometry (Fig. 2; RM-ANOVA, stoichiometry x time:  $F_{1,601} = 7.53$ ,  $P = 0.006$ ). In  
282 the no-phage control chemostats, *Synechococcus* strains remained susceptible to the ancestral  
phage. However, nearly all (~ 96 %) of the derived phage from the phage-amended chemostats  
284 lost the ability to infect some of the *Synechococcus* hosts from the P-limited (n = 51) and N-  
limited (n = 22) no-phage chemostats. Despite this, we found evidence of host-range expansion.  
286 For example, a phage strain from a P-limited chemostat (day 129) was able to infect a  
*Synechococcus* strain (day 166) that was resistant to the ancestral phage. In addition, three phage  
288 strains from N-limited chemostats and two phage strains from P-limited chemostats (day 166)  
were able to infect phage-resistant *Synechococcus* isolated from other chemostats earlier in the  
290 study.

Time-shift experiments indicated that nutrient stoichiometry altered coevolutionary  
292 dynamics (Figs. 3 and 4). When hosts isolated from the phage-amended chemostats were  
challenged against current and past phage, interaction strengths were generally weak owing to  
294 the evolution of host resistance and phage infectivity (Fig. 3 and Fig 4 a, b; RM-ANOVA,  
stoichiometry x phage isolation time x bacterial isolation time,  $F_{1,597} = 24.67$ ,  $P < 0.0001$ ). Hosts  
296 were more susceptible when challenged against future phage, but only for *Synechococcus* strains  
that were isolated earlier in the chemostat experiment (days -6, 9, and 23). The effect of nutrient

298 stoichiometry was more evident in time-shift experiments where naïve hosts from the no-phage  
control chemostats were challenged against phage isolated from the phage-amended chemostats  
300 (stoichiometry x phage isolation time,  $F_{1, 282} = 7.25$ ,  $P = 0.0075$ ). Under these conditions,  
infectivity was not uniformly high across the time-shifts (Fig 3 and Fig. 4 c, d), as would be  
302 expected from purely arms-race dynamics. As a result, infectivity was 70 % greater on naïve  
hosts isolated from N-limited chemostats ( $0.61 \pm 0.289$ ) compared to naïve hosts isolated from  
304 P-limited chemostats ( $0.36 \pm 0.332$ ).

Network analyses lent further support that nutrient stoichiometry affected host-phage  
306 coevolution. Patterns of infectivity were more nested and modular than expected by chance ( $P <$   
 $0.05$ ), which is consistent with arms race dynamics and negative frequency-dependent selection,  
308 respectively. The infection networks from N- and P-limited environments had similar degrees of  
connectance ( $t_4 = 1.47$ ,  $P = 0.22$ ) and nestedness (NODF,  $t_4 = -0.37$ ,  $P = 0.72$ ). However, P-  
310 limited networks were 50 % more modular than N-limited networks (Fig. 5;  $t_4 = -3.59$ ,  $P = 0.02$ ).  
See Table S6 for summary statistics.

312

## DISCUSSION

314 The supply ratio of nitrogen (N) and phosphorus (P) had strong eco-evolutionary effects  
on marine *Synechococcus* and its phage. Communities were more stable under P-limitation than  
316 N-limitation, which likely was influenced by the nutritional flexibility and constraints of the host  
and phage populations, respectively. In addition, host-phage dynamics were influenced by the  
318 rapid invasion of resistant cyanobacteria which was followed by the appearance of evolved  
phage with altered host-ranges. Using time-shift assays and network analyses, we detected strong  
320 signatures of arms-race dynamics in both nutrient treatments. However, under P-limitation, we

also observed patterns of increased network modularity consistent with negative frequency-  
322 dependent selection, which may reflect the underlying costs of maintaining defense and  
virulence traits in different nutrient environments. Our findings generate testable predictions  
324 regarding the mechanisms of local adaptation and coevolution for microorganisms among  
regions of the world ocean that are limited to varying degrees by N and P (Galbraith & Martiny  
326 2015).

328 **Stoichiometry altered community dynamics** — Consistent with predictions from the theory of  
ecological stoichiometry (Sterner & Elser 2002), we documented that *Synechococcus* and phage  
330 dynamics were highly sensitive to the N : P supply ratio. Under N-limitation, host-phage  
dynamics were less stable and out-of-phase, compared to P-limited chemostats (Fig. 1; Table  
332 S4). Historically, ecologists have attempted to explain such variation in populations and  
communities while assuming a single currency of resource. However, systems can exhibit a  
334 much wider range of behaviors when resource stoichiometry is explicitly considered owing to  
feedbacks that arise when interacting species vary in the degree to which their elemental  
336 composition is homeostatically regulated (Andersen *et al.* 2004). For example, the molar N : P  
ratio of marine *Synechococcus* converges upon the canonical Redfield value of 16 : 1 in some  
338 environments (Garcia *et al.* 2016), but in other instances can exceed 100 : 1 (Bertilsson *et al.*  
2003) reflecting the extreme plasticity of its biomass stoichiometry. In contrast, phage are  
340 thought to have a fixed elemental composition owing to their relatively simple structure, which  
minimally consists of genetic material (DNA or RNA) protected by a proteinaceous capsid  
342 (Jover *et al.* 2014). Biophysical models predict that the T4-like phage used in our study has a  
high P demand reflected by its low N : P ratio of approximately 7 : 1 (Jover *et al.* 2014). As a  
344 consequence, phage productivity is largely dependent on the P content of their hosts. For

example, host lysis was delayed by 18 h leading to an 80 % reduction in phage burst size when  
346 P-limited *Synechococcus* WH7803 was infected with a myovirus (Wilson *et al.* 1996). Consistent  
with these reports, early in our experiment (day -6), phage infectivity was 50 % lower on P-  
348 limited vs. N-limited hosts (cf. Fig. 4A and 4B). It is possible, however, for phage to overcome  
the nutritional constraints of their microbial hosts. Many phage contain auxiliary metabolic genes  
350 that modify a host's resource allocation (Monier *et al.* 2017). For example, phage-encoded genes  
for phosphorus acquisition (*pstS* and *phoA*) were upregulated when phosphorus-starved marine  
352 *Prochlorococcus* was infected by phage P-SSM2 (Zeng & Chisholm 2012). While the myovirus  
used in our study (S-RIM8) does not contain phosphate-binding protein or alkaline phosphatase  
354 genes, it does contain *phoH*. The exact function of *phoH* in marine microorganisms has not been  
demonstrated, but it is thought to encode a phosphate-starvation inducible protein that  
356 hydrolyzes ATP, thus liberating energy that can be used in P uptake (Goldsmith *et al.* 2011).  
Such findings suggest that nutrient stoichiometry can profoundly shape host-parasite dynamics  
358 (Aalto *et al.* 2015) and provide an ecological explanation for the patterns observed in our study  
(Fig. 1).

360

**Stoichiometry altered coevolution** — Our results indicate that evolutionary processes were also  
362 important in creating feedbacks that influenced host-phage dynamics. Such feedbacks arise when  
rapid changes in host or parasite traits generate patterns that are not predicted from traditional  
364 ecological theory (Yoshida *et al.* 2007; Frickel *et al.* 2016). These so-called cryptic dynamics  
require the coexistence of multiple host genotypes, for example, through trade-offs in  
366 competitive ability and parasite defense (Yoshida *et al.* 2007). While there are many intracellular  
and extracellular mechanisms that bacteria can employ to resist phage infection, in



368 *Synechococcus*, mutations in genes encoding for cell-surface receptors reduce or entirely  
eliminate attachment, thus precluding entry of the virus into the host (Stoddard *et al.* 2007;  
370 Marston *et al.* 2012). Selection for this phenotype could help explain the recovery of host  
densities in our chemostats (Fig. 1). However, resistance mutations in *Synechococcus* are often  
372 accompanied by a reduction in growth rate, the magnitude of which can vary depending on the  
identity of the host and virus (Lennon 2007). These fitness costs have important consequences  
374 for understanding community stability. Without a reduction in growth rate, resistant  
*Synechococcus* would outcompete the sensitive host and drive the phage population extinct.  
376 Moreover, fitness costs establish a trade-off that satisfies the requirement for cryptic dynamics to  
emerge (Yoshida *et al.* 2007). In sum, our data support the view that nutrient stoichiometry  
378 altered host-phage dynamics and stability via eco-evolutionary feedbacks (Lennon & Martiny  
2008).

380 Nutrient stoichiometry had strong, yet importantly, asymmetric effects on microbial  
coevolution in our study. These effects were examined in light of the two primary modes by  
382 which antagonistic coevolution is thought to occur. The first is through arms-race dynamics  
involving gene-for-gene specificity, where directional selection leads to sweeps that are  
384 characterized by the escalation of resistance and infectivity. Arms-race dynamics were originally  
described for coevolving populations of plants and pathogens, but since then have been  
386 commonly reported in studies of bacteria and phage (Dennehy 2012; Koskella & Brockhurst  
2014). The second mode of antagonistic coevolution involves negative frequency-dependent  
388 selection where parasites evolve to infect common hosts, which in turn favors rare host alleles.  
Negative frequency-dependent selection is often associated with infections that require matching  
390 alleles and is well documented in invertebrate systems (Decaestecker *et al.* 2007), but has also

392 been described in some studies of bacteria and phage (Hall *et al.* 2011). While arms-race  
dynamics and negative frequency-dependent selection are often viewed as occupying different  
ends of the coevolutionary spectrum, they are not mutually exclusive (Agrawal & Lively 2002).

394 One powerful way to discern modes of coevolution is through the use of time-shift  
analyses. This approach involves determining the success of infections for combinations of hosts  
396 and parasites that are isolated from different time points in a controlled experiment or other  
longitudinal type of study (Gaba & Ebert 2009). When applied to challenge assays among host  
398 and phage isolates from our chemostats, time-shift analyses indicated that coevolutionary  
dynamics were significantly affected by nutrient stoichiometry (Fig. 3). The effect of nutrient  
400 stoichiometry was relatively weak when examining host strains isolated from phage-amended  
chemostats, which could reflect a mismatch between the time-shift interval and the rates of  
402 coevolution (Gandon *et al.* 2008). In contrast, the effect of nutrient stoichiometry was driven  
largely by interactions between evolved viruses that were challenged against *Synechococcus*  
404 isolated from no-phage control chemostats (Fig. 4 c, d). We expected that these naïve hosts  
would be uniformly and highly susceptible to all phage from the phage-amended chemostats.  
406 Instead, we found that infectivity fluctuated over time and was higher on N-limited vs. P-limited  
*Synechococcus*, reflecting expansion and contraction of the phage host-range (Fig. 4 c, d).  
408 Together, these findings are consistent with observations of asymmetric coevolution that have  
been attributed to the genetic constraints of viral populations (Lenski & Levin 1985). Asymmetry  
410 may also arise from the costs associated with being a generalist phage (Koskella & Brockhurst  
2014), which may be dependent on the resource environment (e.g., nutrient stoichiometry). Such  
412 explanations have been used to explain host-phage coevolution where arms race dynamics give

way to negative frequency dependent selection (Hall *et al.* 2011), in some cases depending on  
414 resource availability (Pascua *et al.* 2014).

The effects of nutrient stoichiometry on coevolution were further supported by results  
416 from our network analyses. With this approach, one can estimate the degree of nestedness that  
exists among pairs of hosts and phage relative to randomized data. Often, infection data from  
418 bacteria-phage systems are highly nested (Flores *et al.* 2011), which means they contain ordered  
subsets of phenotypes whereby hosts from later time points are resistant to earlier phages, and  
420 phage from later time points are able to infect earlier hosts (Weitz *et al.* 2013). In our study,  
infection networks were significantly nested, a pattern that arises from arms-race dynamics.  
422 However, the degree of nestedness was not affected by nutrient stoichiometry. Infection  
networks can also exhibit modularity, which is more consistent with negative frequency-  
424 dependent selection (Weitz *et al.* 2013). Modules reflect dense clusters of interacting host and  
phage compared to other strain combinations found in a bipartite infection matrix. Although less  
426 commonly documented, modularity has been observed in large-scale oceanic surveys of bacteria  
and phage, but has been attributed to local adaptation and the phylogenetic breadth of the hosts  
428 (Flores *et al.* 2013). However, theory suggests that modularity can emerge *via* coevolution  
between two populations at the local scale. Using a "relaxed lock and key" model,  
430 simultaneously nested and modular structures arose under simple chemostat conditions that  
assumed gene matching between phage tail-fibers and host receptors (Beckett & Williams 2013).  
432 Our results agree with these predictions, but suggest that network properties are affected by host  
nutrition. Specifically, we found that host-phage interactions were 50 % more modular under P-  
434 limitation than N-limitation, suggesting that nutrient stoichiometry constrains host-phage  
interactions leading to increased specialization. Such findings are consistent with the view that

436 resources can influence the modes of coevolution based in part on the fitness costs associated  
with host defense and infection strategies (Pascua *et al.* 2014)

438       Mechanistically, there are many ways that nutrient stoichiometry could shape bacteria-  
phage coevolution. For example, the "dangerous nutrients" hypothesis predicts that trajectories  
440 of coevolution can be influenced when receptors used by nutrient-limited hosts also serve as the  
targets of phage adsorption (Menge & Weitz 2009). However, it does not appear that  
442 myoviruses, including the strain used in this study, attach to the protein receptors of  
cyanobacteria that are used for nutrient transport. Instead, evidence from whole-genome  
444 sequencing of the host used in our study suggests that phage-resistant *Synechococcus* accumulate  
mutations in hypervariable genomic islands that encode for lipopolysaccharide (LPS) (Marston  
446 *et al.* 2012), a major component of the outer membrane in Gram-negative bacteria. The structural  
complexity of LPS is affected by nutrient limitation (Brelles-Marino & Boiardi 1997) and such  
448 changes in molecular structure of the cell membrane can interfere with phage adsorption leading  
to resistance (Leon & Bastias 2015). Nevertheless, modification of tail-fibers allow phage to  
450 overcome resistance of marine cyanobacteria in some instances (Schwartz & Lindell 2017) while  
the acquisition of host-like P-assimilation genes may aid in the successful infection of nutrient-  
452 limited hosts (Kelly *et al.* 2013).

454 **Conclusions** — Most organisms live in environments where they are limited by the relative or  
absolute amount of one or more essential resources. It is well established that such variation in  
456 nutrient stoichiometry can regulate ecological phenomena ranging from species interactions to  
ecosystem-level processes. We demonstrated that nutrient stoichiometry also affects the  
458 evolutionary dynamics of microbial communities likely through differences in the expansions

and contraction of virus host-ranges under N- vs. P-limited conditions. Identifying the targets of  
460 selection in contrasting nutrient environments will help elucidate the genetic mechanisms of  
coevolution and the trade-offs associated with defense and virulence traits. While our study  
462 offers promising avenues to better understand bacteria-phage interactions in the aquatic  
environments, nutrient stoichiometry is also important in determining the nutrition, health, and  
464 disease susceptibility for non-microbial hosts and their microbiomes (Smith & Holt 1996), which  
has implications for understanding the persistence, emergence, and evolution of infectious  
466 diseases. In the oceans, phage represent a significant source of mortality for marine  
cyanobacteria like *Synechococcus*, which play a central role in the regulation of biogeochemical  
468 processes, including energy flow, carbon sequestration, and the cycling of nitrogen (N) and  
phosphorus (P). Our findings suggest that the coevolutionary process was differentially affected  
470 by the availability of N and P in ways that could influence the ecology and evolution of one of  
the most abundant and functionally important groups of microorganisms on Earth.

472

### **Acknowledgments**

474 We acknowledge technical support from R Morrison, M Carroll, and BK Lehmkuhl; ancestral  
strains from MF Marston; discussion with CM Lively; feedback from BK Whitaker, KJ Locey,  
476 WR Shoemaker, NI Wisnoski, V Kuo, ME Muscarella, DA Schwartz, RZ Moger-Reischer, JM  
Palange on earlier versions of the manuscript. Financial support was provided by the National  
478 Science Foundation (0851143, 0851113) and the US Army Research Office Grant W911NF-14-  
1-0411. We dedicate this work to the memory of VH Smith.

480

## REFERENCES

- 482 1.  
484 Aalto, S.L., Decaestecker, E. & Pulkkinen, K. (2015). A three-way perspective of stoichiometric  
486 changes on host-parasite interactions. *Trends Parasitol.*, 31, 333-340.
2.  
488 Acquisti, C., Elser, J.J. & Kumar, S. (2009). Ecological Nitrogen Limitation Shapes the DNA  
490 Composition of Plant Genomes. *Mol. Biol. Evol.*, 26, 953-956.
3.  
492 Agrawal, A. & Lively, C.M. (2002). Infection genetics: gene-for-gene versus matching-alleles  
494 models and all points in between. *Evol. Ecol. Res.*, 4, 79-90.
4.  
496 Andersen, T., Elser, J.J. & Hessen, D.O. (2004). Stoichiometry and population dynamics. *Ecol.  
498 Lett.*, 7, 884-900.
5.  
500 Beckett, S.J. & Williams, H.T.P. (2013). Coevolutionary diversification creates nested-modular  
502 structure in phage-bacteria interaction networks. *Interface Focus*, 3: 20130033.
6.  
504 Bertilsson, S., Berglund, O., Karl, D.M. & Chisholm, S.W. (2003). Elemental composition of  
506 marine *Prochlorococcus* and *Synechococcus*: Implications for the ecological stoichiometry  
508 of the sea. *Limnol Oceanogr*, 48, 1721-1731.
7.  
510 Bragg, J.G. & Wagner, A. (2009). Protein material costs: single atoms can make an evolutionary  
512 difference. *Trends Genet.*, 25, 5-8.
8.  
514 Brelles-Marino, G. & Boiardi, J.L. (1997). Mn<sup>2+</sup> deficiency affects growth energetics of *Rhizobium  
516 etli*. *Microbiol. Res.*, 152, 367-371.
9.  
518 Decaestecker, E., Gaba, S., Raeymaekers, J.A.M., Stoks, R., Van Kerckhoven, L., Ebert, D. *et al.*  
520 (2007). Host-parasite 'Red Queen' dynamics archived in pond sediment. *Nature*, 450, 870-  
522 U816.
10.  
524 Dennehy, J.J. (2012). What can phages tell us about host-pathogen coevolution? *Int. J. Evol. Biol.*,  
2012, 396165.
11.  
526 Elser, J.J., Acquisti, C. & Kumar, S. (2011). Stoichiogenomics: the evolutionary ecology of  
528 macromolecular elemental composition. *Trends Ecol. Evol.*, 26, 38-44.
12.  
530 Flombaum, P., Gallegos, J.L., Gordillo, R.A., Rincon, J., Zabala, L.L., Jiao, N.A.Z. *et al.* (2013).  
532 Present and future global distributions of the marine Cyanobacteria *Prochlorococcus* and  
534 *Synechococcus*. *Proc. Natl Acad. Sci. U S A*, 110, 9824-9829.
13.  
536 Flores, C.O., Meyer, J.R., Valverde, S., Farr, L. & Weitz, J.S. (2011). Statistical structure of host-  
538 phage interactions. *Proc. Natl Acad. Sci. U S A*, 108, E288-E297.
- 14.

- 526 Flores, C.O., Poisot, T., Valverde, S. & Weitz, J.S. (2016). BiMat: a MATLAB package to  
facilitate the analysis of bipartite networks. *Methods Ecol. Evol.*, 7, 127-132.
- 528 15.
- 530 Flores, C.O., Valverde, S. & Weitz, J.S. (2013). Multi-scale structure and geographic drivers of  
cross-infection within marine bacteria and phages. *ISME J.*, 7, 520-532.
- 532 16. Frickel, J., Sieber, M. & Becks, L. (2016). Eco-evolutionary dynamics in a coevolving host-  
virus system. *Ecol. Lett.*, 19, 450-459.
- 534 17.
- 536 Gaba, S. & Ebert, D. (2009). Time-shift experiments as a tool to study antagonistic coevolution.  
*Trends Ecol. Evol.*, 24, 226-232.
- 538 18.
- 540 Galbraith, E.D. & Martiny, A.C. (2015). A simple nutrient-dependence mechanism for predicting  
the stoichiometry of marine ecosystems. *Proc. Natl Acad. Sci. U S A*, 112, 8199-8204.
- 542 19.
- 544 Gandon, S., Buckling, A., Decaestecker, E. & Days, T. (2008). Host-parasite coevolution and  
patterns of adaptation across time and space. *J. Evol. Biol.* 21, 1861-1866.
- 546 20.
- 548 Garcia, N.S., Bonachela, J.A. & Martiny, A.C. (2016). Interactions between growth-dependent  
changes in cell size, nutrient supply and cellular elemental stoichiometry of marine  
*Synechococcus*. *ISME J.*, 10, 2715-2724.
- 550 21.
- 552 Goldsmith, D.B., Crosti, G., Dwivedi, B., McDaniel, L.D., Varsani, A., Suttle, C.A. *et al.* (2011).  
Development of *phoH* as a novel signature gene for assessing marine phage diversity. *Appl  
Environ Microbiol*, 77, 7730-7739.
- 554 22.
- 556 Gresham, D., Desai, M.M., Tucker, C.M., Jenq, H.T., Pai, D.A., Ward, A. *et al.* (2008). The  
repertoire and dynamics of evolutionary adaptations to controlled nutrient-limited  
environments in yeast. *PLoS Genet.*, 4.
- 558 23.
- 560 Hall, A.R., Scanlan, P.D., Morgan, A.D. & Buckling, A. (2011). Host-parasite coevolutionary  
arms races give way to fluctuating selection. *Ecol. Lett.*, 14, 635-642.
- 562 24.
- 564 Hall, S.R. (2009). Stoichiometrically explicit food webs: feedbacks between resource supply,  
elemental constraints, and species diversity. *Annu. Rev. Ecol. Evol. Syst.*, 40, 503-528.
- 566 25.
- 568 Haloin, J.R. & Strauss, S.Y. (2008). Interplay between ecological communities and evolution. *Ann.  
N.Y. Acad. Sci.*, 1133, 87-125.
- 570 26.
- Jover, L.F., Effler, T.C., Buchan, A., Wilhelm, S.W. & Weitz, J.S. (2014). The elemental  
composition of virus particles: implications for marine biogeochemical cycles. *Nat. Rev.  
Microbiol.*, 12, 519-528.
- 27.

- 572 Kelly, L., Ding, H.M., Huang, K.H., Osburne, M.S. & Chisholm, S.W. (2013). Genetic diversity  
in cultured and wild marine cyanomyoviruses reveals phosphorus stress as a strong  
selective agent. *ISME J.*, 7, 1827-1841.
- 574 28.
- 576 Kimura, M. (1962). On the probability of fixation of mutant genes in a population. *Genetics*, 47,  
713-719.
- 29.
- 578 Koskella, B. (2014). Bacteria-phage interactions across time and space: merging local adaptation  
and time-shift experiments to understand phage evolution. *Am. Nat.*, 184, S9-S21.
- 580 30.
- 582 Koskella, B. & Brockhurst, M.A. (2014). Bacteria-phage coevolution as a driver of ecological and  
evolutionary processes in microbial communities. *FEMS Microbiol. Rev.*, 38, 916-931.
- 31.
- 584 Lennon, J.T. (2007). Is there a cost of viral resistance in marine cyanobacteria? *ISME J.*, 1, 300-  
312.
- 586 32.
- 588 Lennon, J.T. & Martiny, J.B.H. (2008). Rapid evolution buffers ecosystem impacts of viruses in a  
microbial food web. *Ecol. Lett.*, 11, 1178-1188.
- 33.
- 590 Lenski, R.E. & Levin, B.R. (1985). Constraints on the coevolution of bacteria and virulent phage -  
a model, some experiments, and predictions for natural communities. *Am. Nat.* 125, 585-  
592 602.
- 34.
- 594 Leon, M. & Bastias, R. (2015). Virulence reduction in bacteriophage resistant bacteria. *Front.  
Microbiol.*, 6.
- 596 35.
- 598 Marston, M.F., Pierciey, F.J., Shepard, A., Gearin, G., Qi, J., Yandava, C. *et al.* (2012). Rapid  
diversification of coevolving marine *Synechococcus* and a virus. *Proc. Natl Acad. Sci. U S  
A.*, 109, 4544-4549.
- 600 36.
- 602 Menge, D.N.L. & Weitz, J.S. (2009). Dangerous nutrients: Evolution of phytoplankton resource  
uptake subject to virus attack. *J Theor Bio*, 257, 104-115.
- 37.
- 604 Monier, A., Chambouvet, A., Milner, D.S., Attah, V., Terrado, R., Lovejoy, C. *et al.* (2017).  
Host-derived viral transporter protein for nitrogen uptake in infected marine  
606 phytoplankton. *Proc. Natl Acad. Sci. U S A*, 114: E7489–E7498.
- 38.
- 608 Noble, R.T. & Fuhrman J.A. (1998). Use of SYBR Green 1 for rapid epifluorescence count of  
marine viruses and bacteria. *Aquat. Microb. Ecol.* 14, 113-118.
- 610 39.
- 612 Pascua, L.L., Hall, A.R., Best, A., Morgan, A.D., Boots, M. & Buckling, A. (2014). Higher  
resources decrease fluctuating selection during host-parasite coevolution. *Ecol. Lett.*, 17,  
1380-1388.
- 614 40.
- 616 Rhee, G.Y. (1978). Effects of N:P atomic ratios and nitrate limitation on algal growth cell  
composition, and nitrate uptake. *Limnol. Oceanogr.*, 23, 10-25.



41.  
618 Schwartz, D.A. & Lindell, D. (2017). Genetic hurdles limit the arms race between  
*Prochlorococcus* and the T7-like podoviruses infecting them. *ISME J.*, 11, 1836-1851.
- 620 42.  
622 Smith, V.H. & Holt, R.D. (1996). Resource competition and within-host disease dynamics. *Trends*  
*Ecol. Evol.*, 11, 386-389.
- 624 43.  
626 Sterner, R.W. & Elser, J.J. (2002). *Ecological Stoichiometry: The Biology of Elements from*  
*Molecules to the Biosphere*. Princeton University Press.
- 628 44.  
630 Stoddard, L.I., Martiny, J.B.H. & Marston, M.F. (2007). Selection and characterization of  
632 cyanophage resistance in marine *Synechococcus* strains. *Appl. Environ. Microbiol.*, 73,  
5516-5522.
- 634 45.  
636 Suttle, C.A. (2007). Marine viruses - major players in the global ecosystem. *Nat. Rev. Microbiol.*,  
5, 801-812.
- 638 46.  
640 Turner, C.B., Wade, B.D., Meyer, J.R., Sommerfeld, B.A. & Lenski, R.E. (2017). Evolution of  
642 organismal stoichiometry in a long-term experiment with *Escherichia coli*. *R. Soc. Open*  
*Sci.*, DOI: 10.1098/rsos.170497
- 644 47.  
646 Van Mooy, B.A.S., Rocap, G., Fredricks, H.F., Evans, C.T. & Devol, A.H. (2006). Sulfolipids  
648 dramatically decrease phosphorus demand by picocyanobacteria in oligotrophic marine  
environments. *Proc. Natl Acad. Sci. U S A*, 103, 8607-8612.
- 650 48.  
652 Weitz, J.S., Poisot, T., Meyer, J.R., Flores, C.O., Valverde, S., Sullivan, M.B. *et al.* (2013). Phage-  
654 bacteria infection networks. *Trends Microbiol.*, 21, 82-91.
- 656 49.  
658 Wilson, W.H., Carr, N.G. & Mann, N.H. (1996). The effect of phosphate status on the kinetics of  
cyanophage infection in the oceanic cyanobacterium *Synechococcus* sp WH7803. *J.*  
*Phycol.*, 32, 506-516.
- 650 50.  
652 Yamamichi, M., Meunier, C.L., Peace, A., Prater, C. & Rua, M.A. (2015). Rapid evolution of a  
654 consumer stoichiometric trait destabilizes consumer-producer dynamics. *Oikos*, 124, 960-  
969.
- 656 51.  
658 Yoshida, T., Ellner, S.P., Jones, L.E., Bohannan, B.J.M., Lenski, R.E. & Hairston, N.G. (2007).  
Cryptic population dynamics: Rapid evolution masks trophic interactions. *PLoS. Biol.*, 5,  
1868-1879.
- 656 52.  
658 Zeng, Q. & Chisholm, S.W. (2012). Marine viruses exploit their host's two-component regulatory  
system in response to resource limitation. *Curr Biol*, 24.

660

## FIGURE CAPTIONS

662

**Fig. 1.** Microbial community dynamics were affected by nutrient stoichiometry. *Synechococcus* and phage densities were tracked in replicate ( $n = 3$ ) chemostats receiving nitrogen (N)- or phosphorus (P)-limited media. Vertical lines at day 0 indicate time of phage amendment. See Fig. S2 for *Synechococcus* dynamics in the no-phage control chemostats. Data are represented as mean  $\pm$  SEM.

668

**Fig. 2** Average phage-resistance of *Synechococcus* strains increased monotonically over time under both nitrogen (N)- and phosphorus (P)-limitation (left). Resistance was calculated as the proportion of unsuccessful infections between all phage strains from the experiment when challenged against *Synechococcus* strains that had been isolated at a specific time point and is presented as the chemostat mean  $\pm$  SEM. Average infectivity of phage over time (right) was calculated as the proportion of successful infections between all *Synechococcus* strains across the experiment when challenged against phage strains that had been isolated (on the ancestral host) at a specific time point and is presented as the chemostat mean  $\pm$  SEM.

**Fig. 3** Phenotypic coevolution between hosts (*Synechococcus*) and phage was affected by nutrient stoichiometry. We calculated infectivity based on the proportion of successful infections between *Synechococcus* strains and phage strains that were isolated from chemostats at different time points. Infectivity is proportional to the width of the edges (lines) connecting nodes (symbols). Black squares correspond to phage isolated from the phage-amended chemostats, white circles correspond to *Synechococcus* isolated from phage-amended chemostats, and grey circles correspond to naive *Synechococcus* isolated from no-phage control chemostats. The

absence of a line indicates that *Synechococcus* isolates were resistant to a particular phage  
686 challenge.

688 **Fig. 4.** Time-shift analysis of host-phage infectivity reveals the effects of stoichiometry on  
coevolution. Contemporary interactions (i.e., those between a host and phage strain isolated at  
690 the same time point) are centered at time zero (grey vertical line) along the time-shift  
(horizontal) axis. Interactions with past phage are shifted to the left (negative values) and  
692 interactions with future phage are shifted to the right (positive values). Each black line  
corresponds with the mean infectivity for *Synechococcus* isolated from a specific time point as  
694 indicated by the open circle containing the isolation day (-6, 9, 23, 72, 100, 129, or 166). When  
comparing challenges between hosts and phage from phage-amended chemostats (a, b),  
696 infectivity was weak for hosts that were isolated after day 23 or when challenged against phage  
from the past owing to the evolution of resistance. Such findings are consistent with arms-race  
698 dynamics where directional selection gives rise to escalating host resistance. We also challenged  
phage against naive hosts from the no-phage control chemostats (c, d). From this, we found that  
700 infectivity was significantly higher under nitrogen (N)-limitation than phosphorus (P)-limitation,  
but overall, was lower than what would be expected under arms-race dynamics. Instead, the  
702 fluctuations in infectivity with respect to time-shift are consistent with negative frequency-  
dependent selection and reflect asymmetry in the coevolution between *Synechococcus* and  
704 phage.

706 **Fig. 5.** Host-phage infection networks based on interactions between *Synechococcus* and phage  
isolates that coevolved under nitrogen (N)- and phosphorus (P)-limitation. Networks were

708 significantly nested, consistent with expectations of host-phage systems coevolving under arms  
race dynamics. However, the degree of nestedness was not affected by stoichiometry. Left panel:  
710 Networks were also significantly modular when compared to randomized networks, but the  
degree of modularity was significantly greater in P-limited networks. Right panel: Infection  
712 networks reflecting the modular structure of host-phage interactions within each chemostat. Each  
grouping of colored cells within a grey-colored background panel corresponds to a calculated  
714 module within the interaction network of N-limited (a – c) or P-limited (d – f) chemostats. That  
is, colored cells correspond to infectious interactions that could not be regrouped into a  
716 calculated module based on the network algorithm.

718

Fig. 1

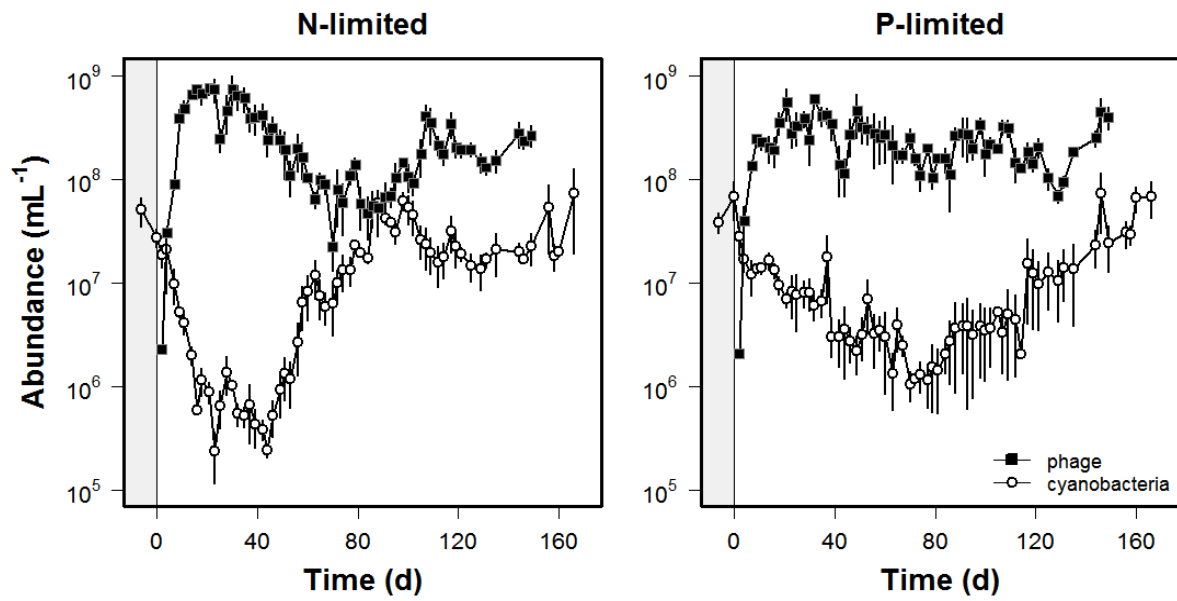

720

722

**Fig. 2**

724

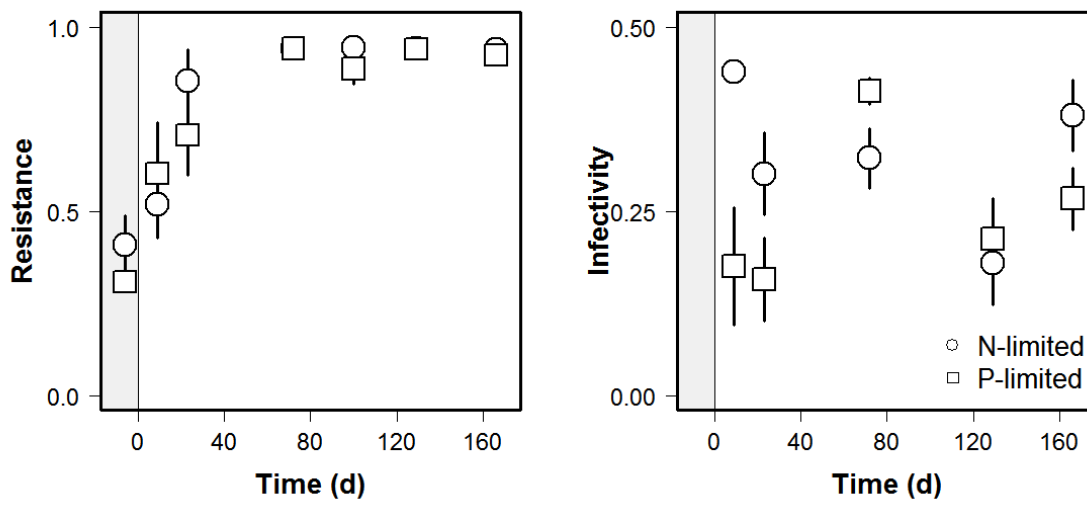

726

728

**Fig. 3**

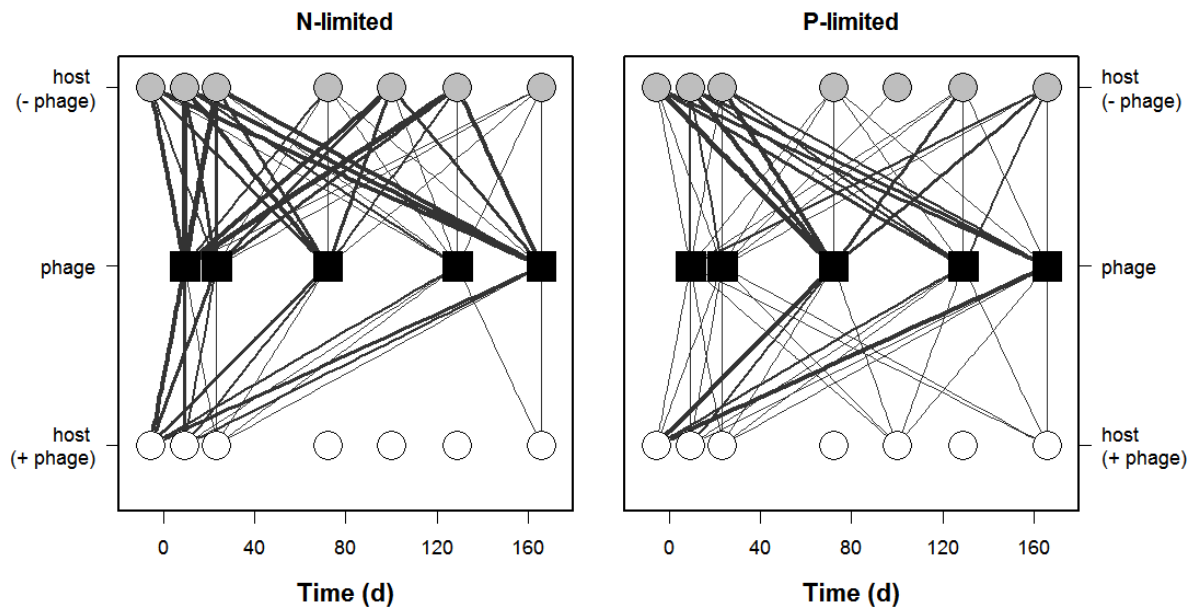

730

732

734

736

**Fig. 4**

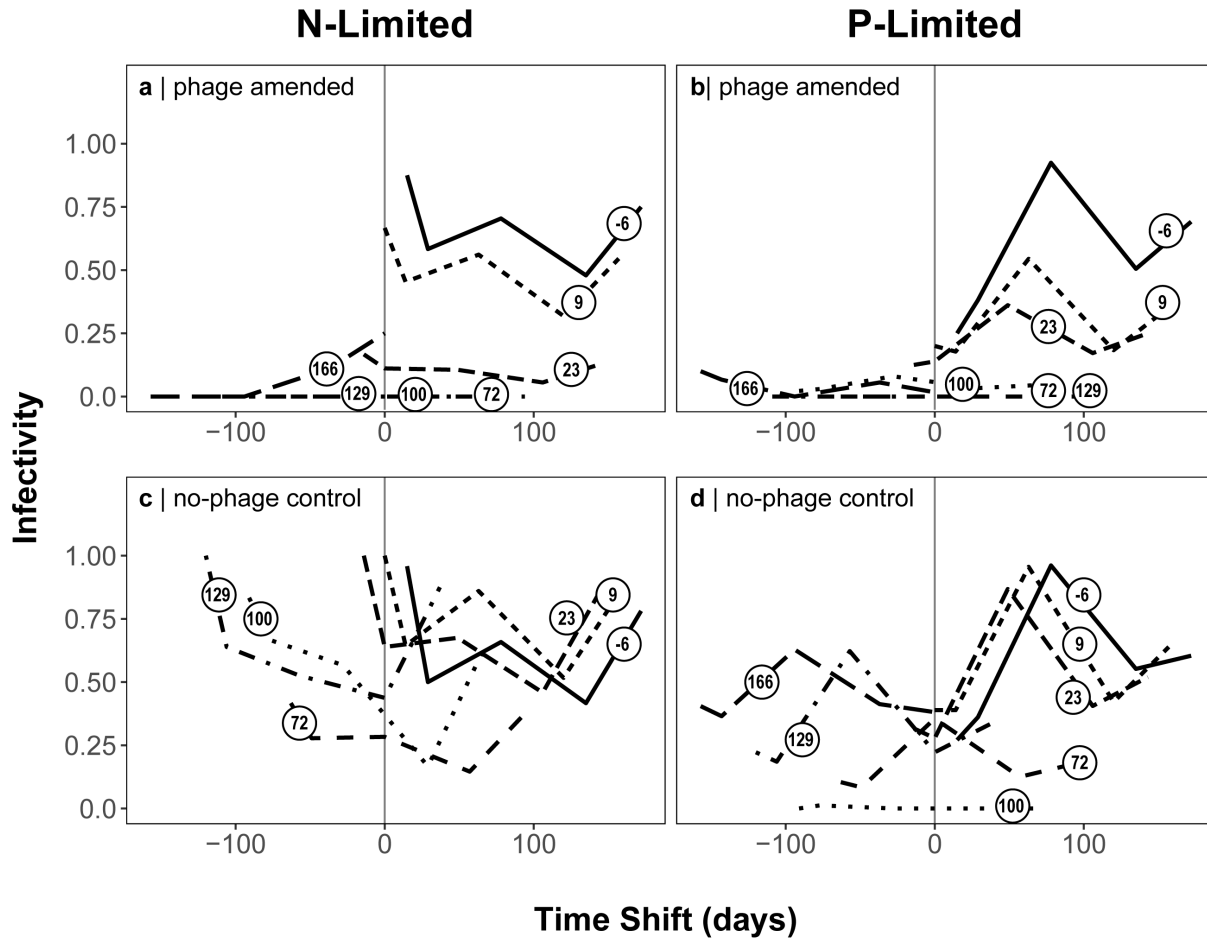

738



740 **Fig. 5**

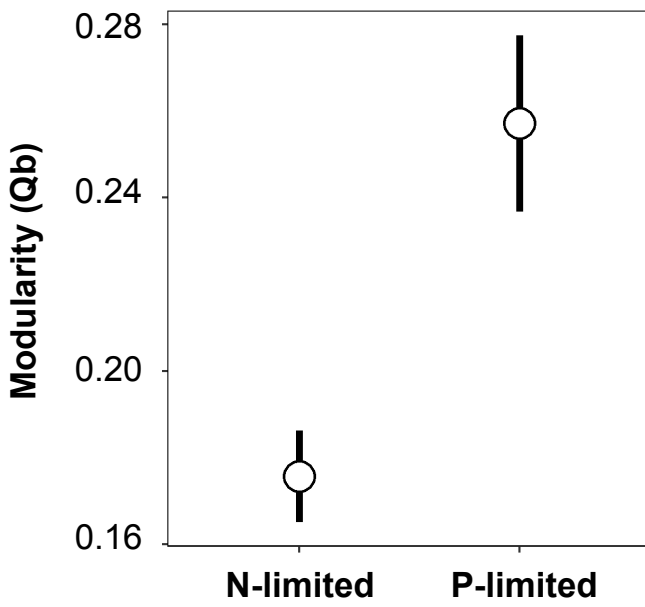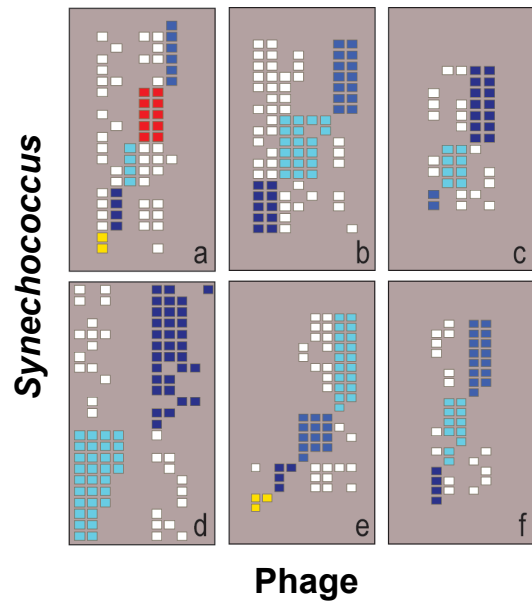

742

744

746
